# Supplementary material for: Identification of Tissue-Specific Gene Clusters Induced by DNA Demethylation in Lung Adenocarcinoma: More Than Germline Genes
Source: MDPI journal article supplement (doi:10.3390/cancers14041007), 2022-02-16
Supplement: s1 [file s1]

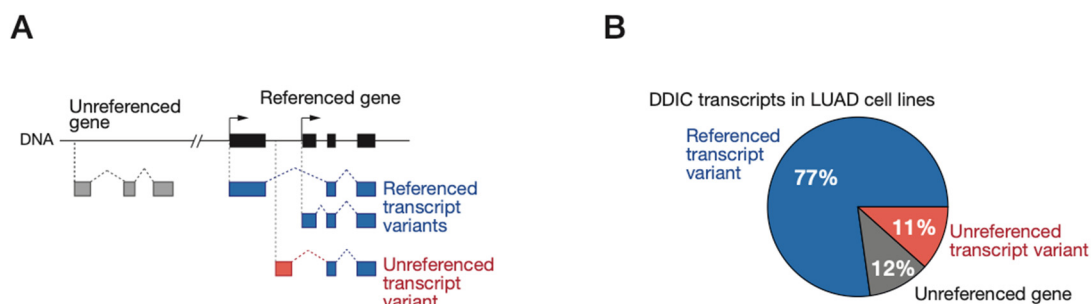

**Figure S1.** Identified DDIC transcripts derive from referenced and unreferenced genes and — transcript variants. A) DDIC transcripts which were identified in our screening of RNA-seq data were compared to the annotated reference genome. The meaning of referenced vs unreferenced genes and transcript variants is shown below. B) Proportions of DDIC in each of these categories is presented.

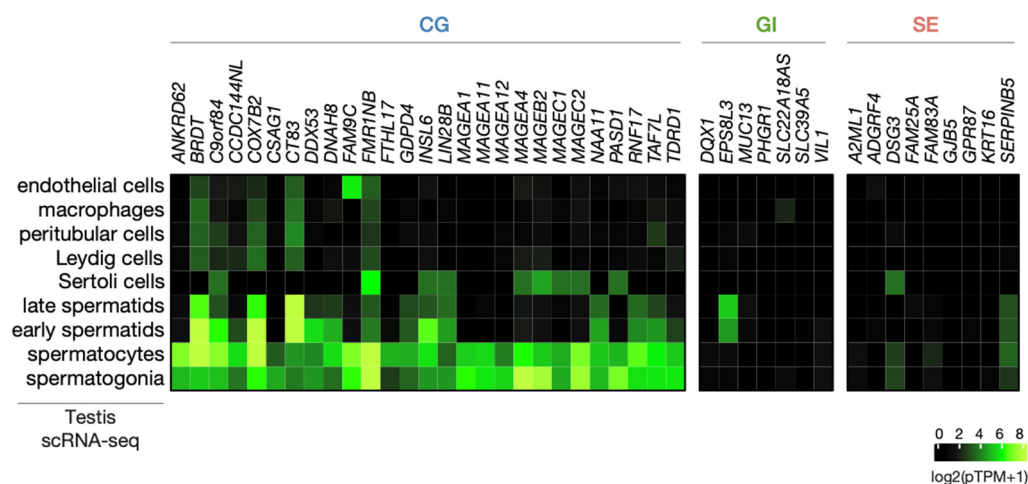

**Figure S2.** CG-DDIC genes are predominantly expressed in testicular germ cells. Heatmap representing the expression level of CG-, GI- and SE-DDIC genes in cells constituting the tissue of the testis (scRNA-seq data from the HPA; pTPM: protein Transcripts Per Million).

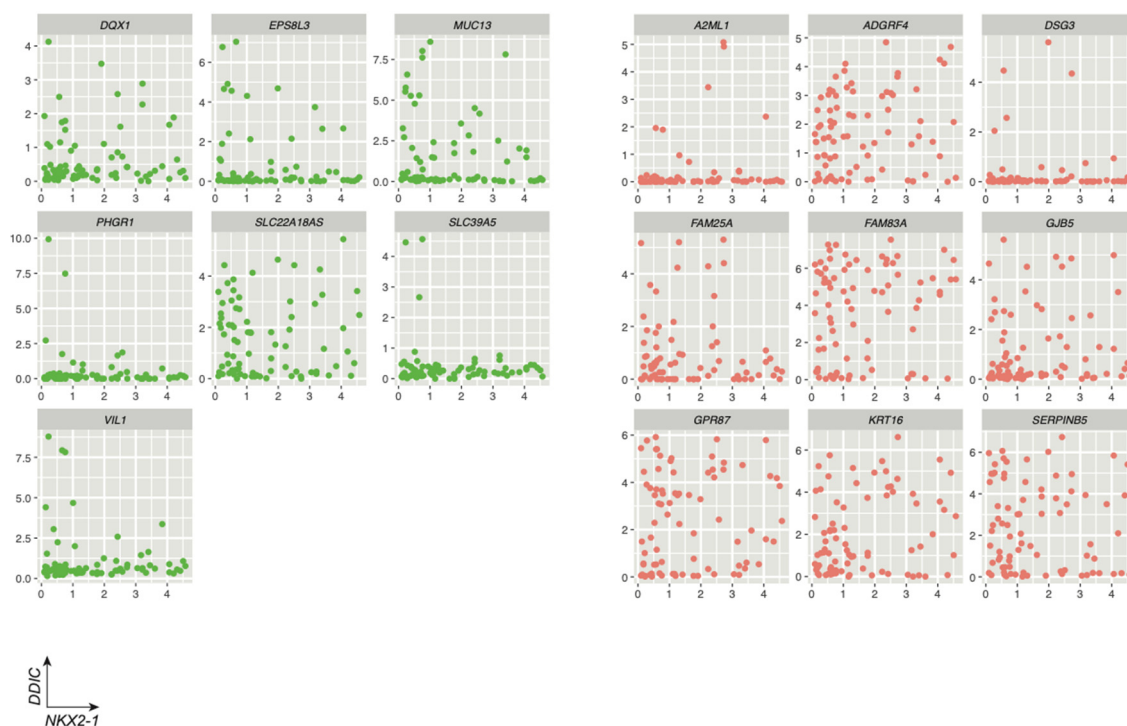

**Figure S3.** GI- and SE-DDIC genes are co-expressed with NKX2-1, an AT2-specific marker. Each dot represents a LUAD cell line for which DDIC gene and NKX2-1 expressions are reported on the y and x axis respectively. The DDIC gene name is reported on top of each graph. Expression data (in  $\log_2(\text{TPM}+1)$ ) were obtained via DepMap portal (<https://depmap.org/portal/>) and correspond to 19Q3 release.

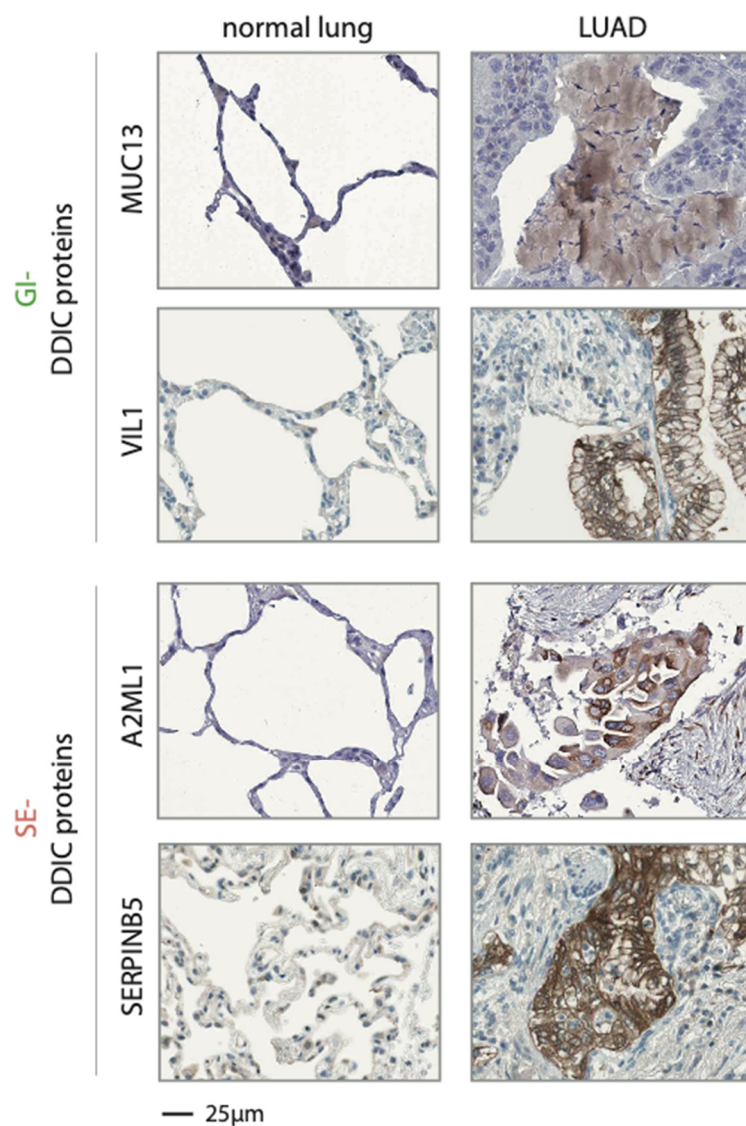

**Figure S4.** GI- and SE-DDIC proteins are ectopically expressed in LUAD tissue samples. Immunohistochemical images from the HPA of normal lung and LUAD tissue samples stained with antibodies targeting the above-mentioned GI- and SE-DDIC proteins. Antibodies and tissue codes are listed in supplementary Table S5 and were selected using the same criteria as described in the material and methods section.

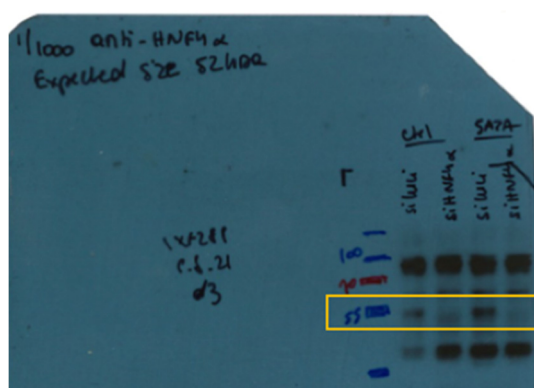

A

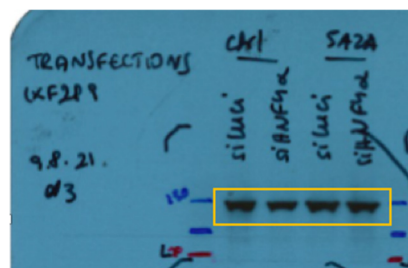

B

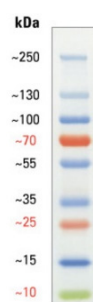

C

| Condition | Treatment | Lanes | VCL area  | HNF4A area | HNF4A/VCL area ratio | % siLuc condition |
|-----------|-----------|-------|-----------|------------|----------------------|-------------------|
| siLuc     | ctrl      | 1     | 42345,936 | 16245,108  | 0,384                | 100               |
| siHNF4a   | ctrl      | 2     | 35563,016 | 11172,915  | 0,314                | 81,9              |
| siLuc     | 5-azadC   | 3     | 42110,714 | 35563,057  | 0,845                | 100               |
| siHNF4a   | 5-azadC   | 4     | 38624,844 | 5159,388   | 0,134                | 15,8              |

D

**Figure S5.** Raw images of western-blot films corresponding to Fig. 5D. Original uncropped images of HNF4A (A) and VCL (B) detections. Yellow rectangles delineate the image parts shown in the main figure. C) Protein size bands of the marker used (in kDa; PageRuler ThermoFischer). Protein sizes are indicated in red and blue on the film images. D) Signal quantifications of the lanes of interest (A) using ImageJ software (v1.43).

**Table S1.** Methylomic and transcriptomic datasets of LUAD cell lines used in this study.

| Sample       | Type      | Pathology           | Accession | File   | Assay       | BioProject | Method               | Layout | Platform            | Reference          |
|--------------|-----------|---------------------|-----------|--------|-------------|------------|----------------------|--------|---------------------|--------------------|
| A427         | cell line | lung adenocarcinoma | DRR01665  | Fast Q | methylation | PRJDB192   | Bisulfite-sequencing | paired | Illumina HiSeq 2500 | Suzuki et al. 2014 |
| A549         | cell line | lung adenocarcinoma | DRR01665  | Fast Q | methylation | PRJDB192   | Bisulfite-sequencing | paired | Illumina HiSeq 2500 | Suzuki et al. 2014 |
| ABC1         | cell line | lung adenocarcinoma | DRR01665  | Fast Q | methylation | PRJDB192   | Bisulfite-sequencing | paired | Illumina HiSeq 2500 | Suzuki et al. 2014 |
| H1299        | cell line | lung adenocarcinoma | DRR01665  | Fast Q | methylation | PRJDB192   | Bisulfite-sequencing | paired | Illumina HiSeq 2500 | Suzuki et al. 2014 |
| H1437        | cell line | lung adenocarcinoma | DRR01665  | Fast Q | methylation | PRJDB192   | Bisulfite-sequencing | paired | Illumina HiSeq 2500 | Suzuki et al. 2014 |
| H1648        | cell line | lung adenocarcinoma | DRR01665  | Fast Q | methylation | PRJDB192   | Bisulfite-sequencing | paired | Illumina HiSeq 2500 | Suzuki et al. 2014 |
| H1650        | cell line | lung adenocarcinoma | DRR01665  | Fast Q | methylation | PRJDB192   | Bisulfite-sequencing | paired | Illumina HiSeq 2500 | Suzuki et al. 2014 |
| H1703        | cell line | lung adenocarcinoma | DRR01665  | Fast Q | methylation | PRJDB192   | Bisulfite-sequencing | paired | Illumina HiSeq 2500 | Suzuki et al. 2014 |
| H1819        | cell line | lung adenocarcinoma | DRR01666  | Fast Q | methylation | PRJDB192   | Bisulfite-sequencing | paired | Illumina HiSeq 2500 | Suzuki et al. 2014 |
| H1975        | cell line | lung adenocarcinoma | DRR01666  | Fast Q | methylation | PRJDB192   | Bisulfite-sequencing | paired | Illumina HiSeq 2500 | Suzuki et al. 2014 |
| H2126        | cell line | lung adenocarcinoma | DRR01666  | Fast Q | methylation | PRJDB192   | Bisulfite-sequencing | paired | Illumina HiSeq 2500 | Suzuki et al. 2014 |
| H2228        | cell line | lung adenocarcinoma | DRR01666  | Fast Q | methylation | PRJDB192   | Bisulfite-sequencing | paired | Illumina HiSeq 2500 | Suzuki et al. 2014 |
| H2347        | cell line | lung adenocarcinoma | DRR01666  | Fast Q | methylation | PRJDB192   | Bisulfite-sequencing | paired | Illumina HiSeq 2500 | Suzuki et al. 2014 |
| H322         | cell line | lung adenocarcinoma | DRR01666  | Fast Q | methylation | PRJDB192   | Bisulfite-sequencing | paired | Illumina HiSeq 2500 | Suzuki et al. 2014 |
| II18         | cell line | lung adenocarcinoma | DRR01666  | Fast Q | methylation | PRJDB192   | Bisulfite-sequencing | paired | Illumina HiSeq 2500 | Suzuki et al. 2014 |
| LC2ad        | cell line | lung adenocarcinoma | DRR01666  | Fast Q | methylation | PRJDB192   | Bisulfite-sequencing | paired | Illumina HiSeq 2500 | Suzuki et al. 2014 |
| PC14         | cell line | lung adenocarcinoma | DRR01666  | Fast Q | methylation | PRJDB192   | Bisulfite-sequencing | paired | Illumina HiSeq 2500 | Suzuki et al. 2014 |
| PC3          | cell line | lung adenocarcinoma | DRR01666  | Fast Q | methylation | PRJDB192   | Bisulfite-sequencing | paired | Illumina HiSeq 2500 | Suzuki et al. 2014 |
| PC7          | cell line | lung adenocarcinoma | DRR01667  | Fast Q | methylation | PRJDB192   | Bisulfite-sequencing | paired | Illumina HiSeq 2500 | Suzuki et al. 2014 |
| PC9          | cell line | lung adenocarcinoma | DRR01667  | Fast Q | methylation | PRJDB192   | Bisulfite-sequencing | paired | Illumina HiSeq 2500 | Suzuki et al. 2014 |
| RERF_LC_A d1 | cell line | lung adenocarcinoma | DRR01667  | Fast Q | methylation | PRJDB192   | Bisulfite-sequencing | paired | Illumina HiSeq 2500 | Suzuki et al. 2014 |
| RERF_LC_A d2 | cell line | lung adenocarcinoma | DRR01667  | Fast Q | methylation | PRJDB192   | Bisulfite-sequencing | paired | Illumina HiSeq 2500 | Suzuki et al. 2014 |
| RERF_LC_K J  | cell line | lung adenocarcinoma | DRR01667  | Fast Q | methylation | PRJDB192   | Bisulfite-sequencing | paired | Illumina HiSeq 2500 | Suzuki et al. 2014 |
| RERF_LC_M S  | cell line | lung adenocarcinoma | DRR01667  | Fast Q | methylation | PRJDB192   | Bisulfite-sequencing | paired | Illumina HiSeq 2500 | Suzuki et al. 2014 |
| RERF_LC_O K  | cell line | lung adenocarcinoma | DRR01667  | Fast Q | methylation | PRJDB192   | Bisulfite-sequencing | paired | Illumina HiSeq 2500 | Suzuki et al. 2014 |
| VMRC_LCD     | cell line | lung adenocarcinoma | DRR01667  | Fast Q | methylation | PRJDB192   | Bisulfite-sequencing | paired | Illumina HiSeq 2500 | Suzuki et al. 2014 |
| A427         | cell line | lung adenocarcinoma | DRR01669  | Fast Q | expression  | PRJDB225   | bulk RNA-seq         | paired | Illumina HiSeq 2500 | Suzuki et al. 2014 |
| A549         | cell line | lung adenocarcinoma | DRR01669  | Fast Q | expression  | PRJDB225   | bulk RNA-seq         | paired | Illumina HiSeq 2500 | Suzuki et al. 2014 |
| ABC1         | cell line | lung adenocarcinoma | DRR01669  | Fast Q | expression  | PRJDB225   | bulk RNA-seq         | paired | Illumina HiSeq 2500 | Suzuki et al. 2014 |

|              |           |                     |           |        |            |           |              |        |                     |                    |
|--------------|-----------|---------------------|-----------|--------|------------|-----------|--------------|--------|---------------------|--------------------|
| H1299        | cell line | lung adenocarcinoma | DRR016697 | Fast Q | expression | PRJDB2256 | bulk RNA-seq | paired | Illumina HiSeq 2500 | Suzuki et al. 2014 |
| H1437        | cell line | lung adenocarcinoma | DRR016698 | Fast Q | expression | PRJDB2256 | bulk RNA-seq | paired | Illumina HiSeq 2500 | Suzuki et al. 2014 |
| H1648        | cell line | lung adenocarcinoma | DRR016699 | Fast Q | expression | PRJDB2256 | bulk RNA-seq | paired | Illumina HiSeq 2500 | Suzuki et al. 2014 |
| H1650        | cell line | lung adenocarcinoma | DRR016700 | Fast Q | expression | PRJDB2256 | bulk RNA-seq | paired | Illumina HiSeq 2500 | Suzuki et al. 2014 |
| H1703        | cell line | lung adenocarcinoma | DRR016701 | Fast Q | expression | PRJDB2256 | bulk RNA-seq | paired | Illumina HiSeq 2500 | Suzuki et al. 2014 |
| H1819        | cell line | lung adenocarcinoma | DRR016702 | Fast Q | expression | PRJDB2256 | bulk RNA-seq | paired | Illumina HiSeq 2500 | Suzuki et al. 2014 |
| H1975        | cell line | lung adenocarcinoma | DRR016703 | Fast Q | expression | PRJDB2256 | bulk RNA-seq | paired | Illumina HiSeq 2500 | Suzuki et al. 2014 |
| H2126        | cell line | lung adenocarcinoma | DRR016704 | Fast Q | expression | PRJDB2256 | bulk RNA-seq | paired | Illumina HiSeq 2500 | Suzuki et al. 2014 |
| H2228        | cell line | lung adenocarcinoma | DRR016705 | Fast Q | expression | PRJDB2256 | bulk RNA-seq | paired | Illumina HiSeq 2500 | Suzuki et al. 2014 |
| H2347        | cell line | lung adenocarcinoma | DRR016706 | Fast Q | expression | PRJDB2256 | bulk RNA-seq | paired | Illumina HiSeq 2500 | Suzuki et al. 2014 |
| H322         | cell line | lung adenocarcinoma | DRR016707 | Fast Q | expression | PRJDB2256 | bulk RNA-seq | paired | Illumina HiSeq 2500 | Suzuki et al. 2014 |
| II18         | cell line | lung adenocarcinoma | DRR016708 | Fast Q | expression | PRJDB2256 | bulk RNA-seq | paired | Illumina HiSeq 2500 | Suzuki et al. 2014 |
| LC2ad        | cell line | lung adenocarcinoma | DRR016709 | Fast Q | expression | PRJDB2256 | bulk RNA-seq | paired | Illumina HiSeq 2500 | Suzuki et al. 2014 |
| PC14         | cell line | lung adenocarcinoma | DRR016710 | Fast Q | expression | PRJDB2256 | bulk RNA-seq | paired | Illumina HiSeq 2500 | Suzuki et al. 2014 |
| PC3          | cell line | lung adenocarcinoma | DRR016711 | Fast Q | expression | PRJDB2256 | bulk RNA-seq | paired | Illumina HiSeq 2500 | Suzuki et al. 2014 |
| PC7          | cell line | lung adenocarcinoma | DRR016712 | Fast Q | expression | PRJDB2256 | bulk RNA-seq | paired | Illumina HiSeq 2500 | Suzuki et al. 2014 |
| PC9          | cell line | lung adenocarcinoma | DRR016713 | Fast Q | expression | PRJDB2256 | bulk RNA-seq | paired | Illumina HiSeq 2500 | Suzuki et al. 2014 |
| RERF_LC_A d1 | cell line | lung adenocarcinoma | DRR016714 | Fast Q | expression | PRJDB2256 | bulk RNA-seq | paired | Illumina HiSeq 2500 | Suzuki et al. 2014 |
| RERF_LC_A d2 | cell line | lung adenocarcinoma | DRR016715 | Fast Q | expression | PRJDB2256 | bulk RNA-seq | paired | Illumina HiSeq 2500 | Suzuki et al. 2014 |
| RERF_LC_K J  | cell line | lung adenocarcinoma | DRR016716 | Fast Q | expression | PRJDB2256 | bulk RNA-seq | paired | Illumina HiSeq 2500 | Suzuki et al. 2014 |
| RERF_LC_M S  | cell line | lung adenocarcinoma | DRR016717 | Fast Q | expression | PRJDB2256 | bulk RNA-seq | paired | Illumina HiSeq 2500 | Suzuki et al. 2014 |
| RERF_LC_O K  | cell line | lung adenocarcinoma | DRR016718 | Fast Q | expression | PRJDB2256 | bulk RNA-seq | paired | Illumina HiSeq 2500 | Suzuki et al. 2014 |
| VMRC_LCD     | cell line | lung adenocarcinoma | DRR016719 | Fast Q | expression | PRJDB2256 | bulk RNA-seq | paired | Illumina HiSeq 2500 | Suzuki et al. 2014 |

Table S2. CG-, GI- and SE-DDIC gene list.

| Gene name  | Clu | Str | C  | CpG number | ENSG identifier | TSS      | MCF 7 | TS60 3 | HML ER | Positive tumors (%) | Mean TPM in positive tumors | Correlation coefficient | Ratio | Adjusted p-value | Chi-squared statistic | adjusted p-value | Adjusted Ratio | Adjusted p-value |
|------------|-----|-----|----|------------|-----------------|----------|-------|--------|--------|---------------------|-----------------------------|-------------------------|-------|------------------|-----------------------|------------------|----------------|------------------|
| AC010168.1 | CG  | +   | 12 | 18         | ENSG00000214772 | 14665655 | yes   | yes    | NA     | 14.51               | 4.87                        | NA                      | NA    | NA               | 12.04                 | 0.0192           | 0.82           | 0.8783           |
| AC063977.6 | CG  | -   | 19 | 53         | ENSG00000269072 | 51181966 | yes   | NA     | NA     | 1.57                | 3.90                        | -0.35                   | 0.92  | 7.00E-28         | NA                    | NA               | 0.79           | 0.8783           |



|                |    |   |    |    |                         |               |     |     |     |       |       |       |      |          |       |        |      |        |
|----------------|----|---|----|----|-------------------------|---------------|-----|-----|-----|-------|-------|-------|------|----------|-------|--------|------|--------|
| AC07438<br>9.2 | CG | + | 7  | 38 | ENSG00<br>00023147<br>6 | 16194<br>44   | yes | NA  | no  | 3.92  | 18.10 | -0.62 | 0.92 | 1.47E-29 | 3.38  | 0.4350 | 0.78 | 0.9338 |
| AC09250<br>6.1 | CG | + | 1  | 24 | ENSG00<br>00021586<br>9 | 10407<br>2983 | yes | no  | NA  | 3.92  | 3.07  | -0.55 | 0.92 | 4.21E-24 | 1.72  | 0.7381 | 1.32 | 0.5351 |
| AC09737<br>4.1 | CG | - | 2  | 24 | ENSG00<br>00025984<br>8 | 94947<br>341  | yes | no  | no  | 0.39  | 2.87  | NA    | NA   | NA       | NA    | NA     | NA   | NA     |
| AC09952<br>0.1 | CG | - | 5  | 23 | ENSG00<br>00025157<br>4 | 10539<br>2970 | no  | no  | NA  | 0.39  | 4.06  | NA    | NA   | NA       | NA    | NA     | NA   | NA     |
| AC10963<br>5.2 | CG | + | 11 | 59 | ENSG00<br>00025451<br>8 | 50298<br>579  | yes | NA  | NA  | 1.18  | 4.65  | -0.40 | 0.97 | 2.33E-06 | NA    | NA     | NA   | NA     |
| AC10963<br>5.4 | CG | - | 11 | 68 | ENSG00<br>00025504<br>2 | 50298<br>452  | yes | no  | no  | 3.33  | 34.70 | -0.45 | 0.96 | 8.47E-09 | 2.32  | 0.6080 | 0.78 | 0.9455 |
| AL16040<br>8.1 | CG | + | 1  | 9  | ENSG00<br>00022804<br>4 | 23465<br>6125 | yes | NA  | yes | 5.88  | 14.57 | NA    | NA   | NA       | 3.50  | 0.2749 | 1.01 | 0.9184 |
| ANKRD<br>62    | CG | + | 18 | 55 | ENSG00<br>00018162<br>6 | 12093<br>843  | yes | NA  | yes | 0.39  | 3.37  | -0.47 | 0.95 | 3.89E-12 | NA    | NA     | NA   | NA     |
| AP00238<br>3.3 | CG | + | 11 | 31 | ENSG00<br>00025677<br>9 | 95038<br>372  | yes | NA  | yes | 2.16  | 9.42  | -0.42 | 0.95 | 7.83E-14 | NA    | NA     | 1.71 | 0.8973 |
| BAGE2          | CG | + | 21 | 30 | ENSG00<br>00018717<br>2 | 10413<br>532  | yes | yes | no  | 5.49  | 5.51  | NA    | NA   | NA       | 9.44  | 0.0452 | 2.04 | 0.7440 |
| BRDT           | CG | + | 1  | 39 | ENSG00<br>00013794<br>8 | 91949<br>371  | yes | no  | yes | 29.02 | 20.01 | -0.66 | 0.96 | 2.59E-07 | 12.74 | 0.0160 | 1.59 | 0.1679 |
| C9ORF8<br>4    | CG | - | 9  | 32 | ENSG00<br>00016518<br>1 | 11179<br>5008 | yes | yes | yes | 20.59 | 6.43  | NA    | 0.95 | 4.19E-10 | 13.28 | 0.0143 | 0.90 | 0.5449 |
| CCDC14<br>4NL  | CG | - | 17 | 20 | ENSG00<br>00020521<br>2 | 20868<br>225  | yes | NA  | yes | 1.76  | 3.53  | NA    | NA   | NA       | NA    | NA     | 0.75 | 0.7236 |
| COX7B2         | CG | - | 4  | 28 | ENSG00<br>00017051<br>6 | 46909<br>207  | yes | yes | yes | 13.33 | 25.62 | -0.45 | 0.91 | 5.74E-33 | 18.33 | 0.0018 | 1.75 | 0.8783 |
| CSAG1          | CG | - | X  | 26 | ENSG00<br>00019893<br>0 | 15273<br>3691 | yes | yes | yes | 20.39 | 70.18 | -0.66 | 0.91 | 5.74E-33 | 20.22 | 0.0011 | 0.83 | 0.7236 |
| CT83           | CG | - | X  | 23 | ENSG00<br>00020401<br>9 | 11646<br>2976 | no  | yes | NA  | 50.98 | 55.98 | -0.83 | 0.96 | 8.93E-08 | 0.21  | 0.8996 | 0.90 | 0.7440 |
| DDX53          | CG | + | X  | 27 | ENSG00<br>00018473<br>5 | 22999<br>960  | yes | yes | yes | 3.73  | 5.14  | -0.49 | 0.93 | 1.65E-22 | 10.18 | 0.0334 | 1.71 | 0.9711 |
| DNAH8          | CG | + | 6  | 28 | ENSG00<br>00012472<br>1 | 38723<br>122  | yes | yes | yes | 0.20  | 2.01  | -0.10 | 0.91 | 2.25E-36 | NA    | NA     | NA   | NA     |
| DSCR8          | CG | + | 21 | 31 | ENSG00<br>00019805<br>4 | 38121<br>451  | yes | yes | yes | 8.04  | 21.78 | NA    | NA   | NA       | 9.36  | 0.0452 | 0.80 | 0.8098 |
| FAM9C          | CG | - | X  | 34 | ENSG00<br>00018726<br>8 | 13044<br>602  | yes | yes | yes | 1.18  | 30.26 | -0.30 | 0.97 | 8.33E-07 | NA    | NA     | NA   | NA     |

|                |    |   |    |    |                 |           |     |     |     |       |        |       |      |          |       |          |      |        |
|----------------|----|---|----|----|-----------------|-----------|-----|-----|-----|-------|--------|-------|------|----------|-------|----------|------|--------|
| FMR1NB         | CG | + | X  | 37 | ENSG00176981337 | 14798     | yes | yes | yes | 1.96  | 43.87  | -0.43 | 0.91 | 1.47E-29 | NA    | NA       | 0.47 | 0.7236 |
| FTHL17         | CG | - | X  | 59 | ENSG00132446    | 31072041  | yes | yes | yes | 2.94  | 74.92  | -0.69 | 0.94 | 3.94E-17 | NA    | NA       | 1.27 | 0.9455 |
| GDPD4          | CG | - | 11 | 30 | ENSG00178795    | 77301649  | yes | yes | yes | 0.39  | 7.11   | -0.13 | 0.96 | 1.22E-08 | NA    | NA       | NA   | NA     |
| INSL6          | CG | - | 9  | 50 | ENSG00120210    | 5185639   | yes | NA  | yes | 3.53  | 19.98  | -0.55 | 0.94 | 7.48E-18 | 4.90  | 0.2750   | 0.70 | 0.9455 |
| LIN28B         | CG | + | 6  | 18 | ENSG00187772    | 104936616 | yes | yes | yes | 6.47  | 8.42   | NA    | NA   | NA       | 27.77 | 6.61E-05 | 0.73 | 0.3389 |
| LINC01518      | CG | - | 10 | 26 | ENSG000233515   | 42691721  | yes | no  | yes | 13.33 | 12.57  | NA    | NA   | NA       | 16.43 | 0.0035   | 0.78 | 0.7236 |
| LINC02492      | CG | - | 4  | 22 | ENSG000250590   | 187672755 | no  | NA  | NA  | 6.27  | 4.14   | NA    | NA   | NA       | 9.27  | 0.0454   | 0.74 | 0.2798 |
| MAGEA1         | CG | + | X  | 23 | ENSG000198681   | 153179284 | yes | yes | yes | 14.90 | 53.06  | -0.58 | 0.90 | 2.23E-37 | 12.77 | 0.0160   | 0.73 | 0.0470 |
| MAGEA10-MAGEA5 | CG | - | X  | 35 | ENSG000266560   | 152138493 | NA  | NA  | NA  | 2.75  | 3.85   | -0.48 | 0.91 | 2.66E-36 | 5.32  | 0.2462   | 0.64 | 0.1838 |
| MAGEA11        | CG | + | X  | 32 | ENSG000185247   | 149712060 | yes | yes | yes | 5.49  | 13.24  | NA    | NA   | NA       | 11.57 | 0.0220   | 0.70 | 0.3389 |
| MAGEA12        | CG | + | X  | 28 | ENSG000213401   | 152733757 | yes | yes | yes | 19.61 | 56.72  | -0.66 | 0.91 | 5.74E-33 | 20.69 | 0.0010   | 0.84 | 0.9455 |
| MAGEA4         | CG | + | X  | 23 | ENSG000147381   | 151912495 | yes | yes | yes | 11.57 | 142.20 | -0.44 | 0.91 | 9.70E-35 | 12.17 | 0.0192   | 0.69 | 0.7519 |
| MAGEB2         | CG | + | X  | 34 | ENSG000009939   | 30215563  | yes | yes | yes | 10.00 | 46.08  | -0.57 | 0.92 | 7.04E-25 | 19.38 | 0.0014   | 0.84 | 0.8783 |
| MAGEC1         | CG | + | X  | 27 | ENSG000155495   | 141903894 | yes | yes | yes | 8.24  | 28.82  | -0.51 | 0.91 | 3.09E-31 | 11.98 | 0.0192   | 0.84 | 0.9455 |
| MAGEC2         | CG | - | X  | 22 | ENSG000046774   | 142205290 | yes | yes | yes | 15.88 | 45.32  | -0.54 | 0.91 | 2.65E-36 | 20.99 | 0.0010   | 0.75 | 0.7236 |
| MKRN9P         | CG | - | 12 | 23 | ENSG000258128   | 87784568  | yes | yes | no  | 4.51  | 7.74   | -0.64 | 0.95 | 1.18E-11 | 5.31  | 0.2462   | 2.06 | 0.8783 |
| NAA11          | CG | - | 4  | 27 | ENSG000156269   | 79326061  | yes | yes | yes | 5.88  | 10.31  | -0.53 | 0.92 | 5.02E-28 | 1.26  | 0.8049   | 4.86 | 0.8288 |
| PASD1          | CG | + | X  | 25 | ENSG000166049   | 151563729 | yes | yes | yes | 3.53  | 30.31  | -0.37 | 0.91 | 7.87E-30 | 0.64  | 0.8996   | 0.53 | 0.2723 |
| RNF17          | CG | + | 13 | 37 | ENSG000132972   | 24764169  | yes | yes | yes | 0.98  | 5.69   | -0.39 | 0.91 | 1.29E-30 | NA    | NA       | NA   | NA     |



|            |    |   |    |    |                |           |     |     |     |       |        |       |      |          |       |          |      |        |
|------------|----|---|----|----|----------------|-----------|-----|-----|-----|-------|--------|-------|------|----------|-------|----------|------|--------|
| TAF7L      | CG | - | X  | 29 | ENSG000101297  | 101293057 | yes | yes | yes | 6.86  | 13.18  | -0.10 | 0.91 | 4.18E-33 | 11.10 | 0.0251   | 1.18 | 0.7236 |
| TDRD1      | CG | + | 10 | 36 | ENSG0000095627 | 114179270 | yes | yes | yes | 10.59 | 15.44  | -0.86 | 0.96 | 6.63E-09 | 10.47 | 0.0306   | 1.86 | 0.1243 |
| ZBTB46-AS1 | CG | + | 20 | 52 | ENSG0000231208 | 63808076  | yes | NA  | yes | 5.29  | 8.02   | -0.73 | 0.92 | 6.87E-25 | 4.71  | 0.2796   | 0.84 | 0.8973 |
| DQX1       | GI | - | 2  | 10 | ENSG0000144045 | 74526191  | yes | no  | yes | 19.41 | 7.11   | -0.79 | 0.94 | 2.41E-13 | 1.60  | 0.7502   | 0.76 | 0.8783 |
| EPS8L3     | GI | - | 1  | 12 | ENSG0000198758 | 109763923 | yes | NA  | NA  | 18.63 | 40.76  | -0.66 | 0.94 | 7.55E-14 | 2.62  | 0.5562   | 0.62 | 0.0512 |
| MUC13      | GI | - | 3  | 10 | ENSG0000173702 | 124934747 | no  | yes | yes | 59.02 | 120.55 | -0.61 | 0.96 | 7.91E-09 | 0.92  | 0.8734   | 0.80 | 0.2798 |
| PHGR1      | GI | + | 15 | 7  | ENSG0000233041 | 40351033  | NA  | NA  | no  | 8.43  | 18.94  | -0.42 | 0.94 | 1.56E-16 | 2.69  | 0.5544   | 0.78 | 0.7519 |
| SLC22A18AS | GI | - | 11 | 23 | ENSG0000254827 | 2903490   | no  | yes | no  | 86.27 | 11.34  | -0.54 | 0.96 | 7.16E-09 | 2.62  | 0.3693   | 1.38 | 0.7236 |
| SLC39A5    | GI | + | 12 | 7  | ENSG0000139540 | 56230063  | no  | no  | no  | 10.78 | 18.86  | -0.56 | 0.94 | 2.71E-14 | 0.61  | 0.8049   | 1.09 | 0.8783 |
| VIL1       | GI | + | 2  | 11 | ENSG0000127831 | 218419123 | yes | no  | yes | 42.16 | 36.29  | -0.73 | 0.94 | 3.27E-15 | 3.79  | 0.3775   | 1.19 | 0.8783 |
| A2ML1      | SE | + | 12 | 10 | ENSG0000166535 | 8822621   | yes | no  | NA  | 6.47  | 43.07  | -0.45 | 0.94 | 9.07E-14 | 3.91  | 0.3693   | 0.70 | 0.1838 |
| ADGRF4     | SE | + | 6  | 8  | ENSG0000153294 | 47698580  | yes | no  | no  | 55.29 | 12.62  | -0.53 | 0.95 | 1.17E-14 | 45.29 | 3.94E-08 | 0.62 | 0.0322 |
| DSG3       | SE | + | 18 | 12 | ENSG0000134757 | 31447741  | NA  | yes | yes | 7.06  | 37.95  | -0.33 | 0.95 | 4.74E-12 | 11.03 | 0.0251   | 0.44 | 0.0322 |
| FAM25A     | SE | + | 10 | 12 | ENSG0000188100 | 87020294  | no  | NA  | yes | 3.73  | 9.43   | -0.20 | 0.93 | 2.82E-20 | 18.10 | 0.0019   | 0.69 | 0.1243 |
| FAM83A     | SE | + | 8  | 32 | ENSG0000147689 | 123183158 | yes | yes | yes | 95.88 | 95.37  | -0.53 | 0.96 | 6.47E-07 | 38.85 | 4.58E-07 | 0.44 | 0.0000 |
| GJB5       | SE | + | 1  | 13 | ENSG0000189280 | 34755047  | yes | NA  | yes | 39.61 | 18.62  | -0.35 | 0.93 | 9.98E-19 | 4.75  | 0.2796   | 0.66 | 0.0446 |
| GPR87      | SE | - | 3  | 8  | ENSG0000138271 | 151316820 | yes | NA  | yes | 62.16 | 39.92  | -0.40 | 0.96 | 3.43E-08 | 18.81 | 0.0016   | 0.40 | 0.0322 |
| KRT16      | SE | - | 17 | 27 | ENSG0000186832 | 41612899  | yes | yes | yes | 60.39 | 41.10  | -0.25 | 0.94 | 1.13E-13 | 10.99 | 0.0251   | 0.59 | 0.0050 |
| SERPINB5   | SE | + | 18 | 24 | ENSG0000206075 | 63476958  | yes | yes | yes | 43.73 | 36.59  | -0.25 | 0.93 | 7.97E-18 | 17.53 | 0.0023   | 0.63 | 0.0217 |
| TPRXL      | SE | + | 3  | 11 | ENSG0000180438 | 14017401  | yes | yes | no  | 5.29  | 6.93   | NA    | NA   | NA       | 0.81  | 0.8823   | 0.73 | 0.6652 |

**Table S3.** Methylomic and transcriptomic datasets of normal cells and tissues.

| Sample                 | Type          | Pathology | Accession                                                         | File | Assay        | Genome built   | Method                     | Layout         | Platform                                                         | Reference                              |
|------------------------|---------------|-----------|-------------------------------------------------------------------|------|--------------|----------------|----------------------------|----------------|------------------------------------------------------------------|----------------------------------------|
| alveolar type II       | primary cells | normal    | SRR1773103                                                        | Fas  | methyl-tQ    | not applicable | Whole genome bisulfite-seq | paired         | Illumina HiSeq 2000                                              | Zuber et al. 2016                      |
| sperm                  | primary cells | normal    | GSM1127119                                                        | wig  | methyl-ation | hg19           | Whole genome bisulfite-seq | paired         | Illumina HiSeq 2000                                              | Roadmap Epigenomics 2015               |
| HUES64                 | primary cells | normal    | ENCFF770UYJ                                                       | bed  | methyl-ation | hg38           | Whole genome bisulfite-seq | paired         | Illumina HiSeq 2000                                              | Roadmap Epigenomics 2015               |
| keratinocytes          | primary cells | normal    | GSM1127056                                                        | wig  | methyl-ation | hg19           | Whole genome bisulfite-seq | paired         | Illumina HiSeq 2000                                              | Roadmap Epigenomics 2015               |
| duodenum crypt         | primary cells | normal    | GSE141254                                                         | txt  | methyl-ation | not applicable | Infinium methylation assay | not applicable | HumanMethylation450 BeadChips<br>Infinium MethylationEPIC arrays | Lewis et al. 2020                      |
| adipose                | tissue        | normal    | ENCFF318AMC                                                       | bed  | methyl-ation | hg38           | Whole genome bisulfite-seq | single         | Illumina HiSeq 2500                                              | Roadmap Epigenomics, 2015              |
| esophagus              | tissue        | normal    | ENCFF625GVK                                                       | bed  | methyl-ation | hg38           | Whole genome bisulfite-seq | single         | Illumina HiSeq 2500                                              | Roadmap Epigenomics, 2015              |
| heart (left ventricle) | tissue        | normal    | ENCFF536RSX                                                       | bed  | methyl-ation | hg38           | Whole genome bisulfite-seq | single         | Illumina HiSeq 2500                                              | Roadmap Epigenomics, 2015              |
| liver                  | tissue        | normal    | ENCFF356KGQ                                                       | ba   | methyl-ation | not applicable | Whole genome bisulfite-seq | single         | Illumina HiSeq 2500                                              | Roadmap Epigenomics, 2015              |
| lung                   | tissue        | normal    | ENCFF039JFT                                                       | bed  | methyl-ation | hg38           | Whole genome bisulfite-seq | single         | Illumina HiSeq 2500                                              | Roadmap Epigenomics, 2015              |
| pancreas               | tissue        | normal    | ENCFF763RUE                                                       | bed  | methyl-ation | hg38           | Whole genome bisulfite-seq | single         | Illumina HiSeq 2500                                              | Roadmap Epigenomics, 2015              |
| pre-frontal cortex     | tissue        | normal    | SRR3278486_SRR3278482                                             | Fas  | methyl-tQ    | not applicable | Whole genome bisulfite-seq | paired         | Illumina HiSeq 2500                                              | Jenkinson et al. 2017 (PMID: 28346445) |
| sigmoid colon          | tissue        | normal    | ENCFF157POM                                                       | bed  | methyl-ation | hg38           | Whole genome bisulfite-seq | single         | Illumina HiSeq 2500                                              | Roadmap Epigenomics, 2015              |
| skin (lower leg)       | tissue        | normal    | ENCFF219GCQ                                                       | bed  | methyl-ation | hg38           | Whole genome bisulfite-seq | paired         | Illumina HiSeq X Ten                                             | ENCODE Project Consortium, 2012        |
| small intestine        | tissue        | normal    | ENCFF241AQC                                                       | bed  | methyl-ation | hg38           | Whole genome bisulfite-seq | single         | Illumina HiSeq 2500                                              | Roadmap Epigenomics, 2015              |
| stomach                | tissue        | normal    | ENCFF497YOO                                                       | bed  | methyl-ation | hg38           | Whole genome bisulfite-seq | single         | Illumina HiSeq 2500                                              | Roadmap Epigenomics, 2015              |
| testis                 | tissue        | normal    | ENCFF715DMX                                                       | bed  | methyl-ation | hg38           | Whole genome bisulfite-seq | paired         | Illumina HiSeq X Ten                                             | ENCODE Project Consortium, 2012        |
| thyroid                | tissue        | normal    | ENCFF223LJW                                                       | bed  | methyl-ation | hg38           | Whole genome bisulfite-seq | paired         | Illumina HiSeq X Ten                                             | ENCODE Project Consortium, 2012        |
| alveolar type II       | primary cells | normal    | SRR1852851                                                        | Fas  | expres-tQ    | not applicable | bulk RNA-seq               | paired         | Illumina HiSeq 2000                                              | Marconett et al. 2017                  |
| adipose                | tissue        | normal    | ERR315332_ERR315431<br>ERR315343_ERR315342<br>ERR315378           | Fas  | expres-tQ    | not applicable | bulk RNA-seq               | paired         | Illumina HiSeq 2000                                              | Fagerberg et al. 2014 (PMID: 24309898) |
| colon                  | tissue        | normal    | ERR315357_ERR315484<br>ERR315462_ERR315400<br>ERR315348_ERR315403 | Fas  | expres-tQ    | not applicable | bulk RNA-seq               | paired         | Illumina HiSeq 2000                                              | Fagerberg et al. 2014                  |
| cerebral cortex        | tissue        | normal    | ERR315455_ERR315432<br>ERR315477                                  | Fas  | expres-tQ    | not applicable | bulk RNA-seq               | paired         | Illumina HiSeq 2000                                              | Fagerberg et al. 2014                  |

|                      |        |        |                         |                        |                     |              |        |                     |                                |
|----------------------|--------|--------|-------------------------|------------------------|---------------------|--------------|--------|---------------------|--------------------------------|
| esophagus            | tissue | normal | ERR315411_ERR<br>315398 | Fas expres-<br>tQ sion | not appli-<br>cable | bulk RNA-seq | paired | Illumina HiSeq 2000 | Fagerberg et al. 2014          |
|                      |        |        | ERR315489_ERR<br>315434 |                        |                     |              |        |                     |                                |
|                      |        |        | ERR315472_ERR<br>315362 |                        |                     |              |        |                     |                                |
| heart                | tissue | normal | ERR315384_ERR<br>315328 | Fas expres-<br>tQ sion | not appli-<br>cable | bulk RNA-seq | paired | Illumina HiSeq 2000 | Fagerberg et al. 2014          |
|                      |        |        | ERR315356_ERR<br>315367 |                        |                     |              |        |                     |                                |
|                      |        |        | ERR315413_ERR<br>315435 |                        |                     |              |        |                     |                                |
|                      |        |        | ERR315389_ERR<br>315331 |                        |                     |              |        |                     |                                |
|                      |        |        | ERR315430               |                        |                     |              |        |                     |                                |
| small intes-<br>tine | tissue | normal | ERR315344_ERR<br>315381 | Fas expres-<br>tQ sion | not appli-<br>cable | bulk RNA-seq | paired | Illumina HiSeq 2000 | Fagerberg et al. 2014          |
|                      |        |        | ERR315408_ERR<br>315409 |                        |                     |              |        |                     |                                |
|                      |        |        | ERR315423_ERR<br>315388 |                        |                     |              |        |                     |                                |
|                      |        |        | ERR315419_ERR<br>315364 |                        |                     |              |        |                     |                                |
| liver                | tissue | normal | ERR315327_ERR<br>315414 | Fas expres-<br>tQ sion | not appli-<br>cable | bulk RNA-seq | paired | Illumina HiSeq 2000 | Fagerberg et al. 2014          |
|                      |        |        | ERR315463_ERR<br>315394 |                        |                     |              |        |                     |                                |
|                      |        |        | ERR315451               |                        |                     |              |        |                     |                                |
| lung                 | tissue | normal | SRR577579_SRR5<br>77582 | Fas expres-<br>tQ sion | not appli-<br>cable | bulk RNA-seq |        | Illumina HiSeq 2000 | Roadmap Epige-<br>nomics, 2015 |
| pancreas             | tissue | normal | ERR315466_ERR<br>315436 | Fas expres-<br>tQ sion | not appli-<br>cable | bulk RNA-seq | paired | Illumina HiSeq 2000 | Fagerberg et al. 2014          |
|                      |        |        | ERR315479_ERR<br>315429 |                        |                     |              |        |                     |                                |
|                      |        |        | ERR315339_ERR<br>315401 |                        |                     |              |        |                     |                                |
| skin                 | tissue | normal | ERR315460_ERR<br>315376 | Fas expres-<br>tQ sion | not appli-<br>cable | bulk RNA-seq | paired | Illumina HiSeq 2000 | Fagerberg et al. 2014          |
|                      |        |        | ERR315372_ERR<br>315464 |                        |                     |              |        |                     |                                |
|                      |        |        | ERR315379_ERR<br>315369 |                        |                     |              |        |                     |                                |
| stomach              | tissue | normal | ERR315467_ERR<br>315485 | Fas expres-<br>tQ sion | not appli-<br>cable | bulk RNA-seq | paired | Illumina HiSeq 2000 | Fagerberg et al. 2014          |
|                      |        |        | ERR315352_ERR<br>315415 |                        |                     |              |        |                     |                                |
|                      |        |        | ERR315492               |                        |                     |              |        |                     |                                |
| thyroid              | tissue | normal | ERR315363_ERR<br>315397 | Fas expres-<br>tQ sion | not appli-<br>cable | bulk RNA-seq | paired | Illumina HiSeq 2000 | Fagerberg et al. 2014          |
|                      |        |        | ERR315358_ERR<br>315412 |                        |                     |              |        |                     |                                |
|                      |        |        | ERR315428_ERR<br>315491 |                        |                     |              |        |                     |                                |
|                      |        |        | ERR315483_ERR<br>315422 |                        |                     |              |        |                     |                                |
|                      |        |        | ERR315337               |                        |                     |              |        |                     |                                |
|                      |        |        |                         |                        |                     |              |        |                     |                                |

Table S4. Transcriptomic datasets of cell lines treated with 5-azadC.

| Sample | Type      | Pathology           | Name                                  | Accession   | File  | Assay      | Method       | Layout | Platform            | Reference           |
|--------|-----------|---------------------|---------------------------------------|-------------|-------|------------|--------------|--------|---------------------|---------------------|
| MCF7   | cell line | tumor               | MCF7_RNAseq_control_1day-Normoxia_r1a | SRR7822252  | FastQ | expression | bulk RNA-seq | single | Illumina HiSeq 2500 | D'Anna et al. 2020  |
| MCF7   | cell line | tumor               | MCF7_RNAseq_control_1day-Normoxia_r1b | SRR7822253  | FastQ | expression | bulk RNA-seq | single | Illumina HiSeq 2500 | D'Anna et al. 2020  |
| MCF7   | cell line | tumor               | MCF7_RNAseq_control_1day-Normoxia_r2a | SRR7822254  | FastQ | expression | bulk RNA-seq | single | Illumina HiSeq 2500 | D'Anna et al. 2020  |
| MCF7   | cell line | tumor               | MCF7_RNAseq_control_1day-Normoxia_r2b | SRR7822255  | FastQ | expression | bulk RNA-seq | single | Illumina HiSeq 2500 | D'Anna et al. 2020  |
| MCF7   | cell line | tumor               | MCF7_RNAseq_control_1day-Normoxia_r3a | SRR7822256  | FastQ | expression | bulk RNA-seq | single | Illumina HiSeq 2500 | D'Anna et al. 2020  |
| MCF7   | cell line | tumor               | MCF7_RNAseq_control_1day-Normoxia_r3b | SRR7822257  | FastQ | expression | bulk RNA-seq | single | Illumina HiSeq 2500 | D'Anna et al. 2020  |
| MCF7   | cell line | tumor               | MCF7_RNAseq_aza_1day-Normoxia_r1a     | SRR7822264  | FastQ | expression | bulk RNA-seq | single | Illumina HiSeq 2500 | D'Anna et al. 2020  |
| MCF7   | cell line | tumor               | MCF7_RNAseq_aza_1day-Normoxia_r1b     | SRR7822265  | FastQ | expression | bulk RNA-seq | single | Illumina HiSeq 2500 | D'Anna et al. 2020  |
| MCF7   | cell line | tumor               | MCF7_RNAseq_aza_1day-Normoxia_r2a     | SRR7822266  | FastQ | expression | bulk RNA-seq | single | Illumina HiSeq 2500 | D'Anna et al. 2020  |
| MCF7   | cell line | tumor               | MCF7_RNAseq_aza_1day-Normoxia_r2b     | SRR7822267  | FastQ | expression | bulk RNA-seq | single | Illumina HiSeq 2500 | D'Anna et al. 2020  |
| MCF7   | cell line | tumor               | MCF7_RNAseq_aza_1day-Normoxia_r3a     | SRR7822268  | FastQ | expression | bulk RNA-seq | single | Illumina HiSeq 2500 | D'Anna et al. 2020  |
| MCF7   | cell line | tumor               | MCF7_RNAseq_aza_1day-Normoxia_r3b     | SRR7822269  | FastQ | expression | bulk RNA-seq | single | Illumina HiSeq 2500 | D'Anna et al. 2020  |
| TS603  | cell line | tumor               | TS603_DMSO_rep1                       | SRR12105780 | FastQ | expression | bulk RNA-seq | single | Illumina HiSeq 2000 | Park et al. 2021    |
| TS603  | cell line | tumor               | TS603_DMSO_rep2                       | SRR12105781 | FastQ | expression | bulk RNA-seq | single | Illumina HiSeq 2000 | Park et al. 2021    |
| TS603  | cell line | tumor               | TS603_DAC_rep1                        | SRR12105782 | FastQ | expression | bulk RNA-seq | single | Illumina HiSeq 2000 | Park et al. 2021    |
| TS603  | cell line | tumor               | TS603_DAC_rep2                        | SRR12105783 | FastQ | expression | bulk RNA-seq | single | Illumina HiSeq 2000 | Park et al. 2021    |
| HMLER  | cell line | normal immortalized | HMLER_DAC_1                           | SRR3362409  | FastQ | expression | bulk RNA-seq | single | Illumina HiSeq 2000 | Grandin et al. 2016 |
| HMLER  | cell line | normal immortalized | HMLER_DAC_2                           | SRR3362410  | FastQ | expression | bulk RNA-seq | single | Illumina HiSeq 2000 | Grandin et al. 2016 |
| HMLER  | cell line | normal immortalized | HMLER_Ctrl1                           | SRR3362411  | FastQ | expression | bulk RNA-seq | single | Illumina HiSeq 2000 | Grandin et al. 2016 |
| HMLER  | cell line | normal immortalized | HMLER_Ctrl2                           | SRR3362412  | FastQ | expression | bulk RNA-seq | single | Illumina HiSeq 2000 | Grandin et al. 2016 |

Table S5. Antibodies and tissue section codes from HPA.

| Protein  | DDIC | Antibody  | Tissue    | Pathology | Gender | Age | Patient_ID |
|----------|------|-----------|-----------|-----------|--------|-----|------------|
| MUC13    | GI   | HPA045163 | Lung      | Normal    | Male   | 65  | 1470       |
| VIL1     | GI   | HPA006884 | Lung      | Normal    | Female | 49  | 2268       |
| A2ML1    | SE   | HPA038847 | Esophagus | Normal    | Female | 66  | 3399       |
| A2ML1    | SE   | HPA038847 | Skin      | Normal    | Male   | 52  | 3338       |
| A2ML1    | SE   | HPA038847 | Vagina    | Normal    | Female | 40  | 2276       |
| A2ML1    | SE   | HPA038847 | Lung      | Normal    | Male   | 65  | 1470       |
| SERPINB5 | SE   | CAB009570 | Esophagus | Normal    | Male   | 54  | 3197       |
| SERPINB5 | SE   | CAB009570 | Skin      | Normal    | Male   | 16  | 2549       |
| SERPINB5 | SE   | CAB009570 | Vagina    | Normal    | Female | 44  | 2480       |
| SERPINB5 | SE   | CAB009570 | Lung      | Normal    | Female | 49  | 2268       |
| MUC13    | GI   | HPA045163 | LUAD      | Tumor     | Female | 69  | 2777       |
| VIL1     | GI   | HPA006884 | LUAD      | Tumor     | Female | 70  | 3391       |
| A2ML1    | SE   | HPA038847 | LUAD      | Tumor     | Female | 76  | 448        |
| SERPINB5 | SE   | CAB009570 | LUAD      | Tumor     | Female | 70  | 3391       |

**Table S6.** siRNAs used for transfection experiments.

| siRNA        | Sequence (5'-3')                                                                                                 | Reference                                   | Manufacturer |
|--------------|------------------------------------------------------------------------------------------------------------------|---------------------------------------------|--------------|
| siHNF4A      | GAC-CGG-AUC-AGC-ACU-CGA-A<br>CGG-AAG-AAC-CAC-AUG-UAC-U<br>GGG-CUG-GCA-UGA-AGA-AGG-A<br>CCA-AGU-ACA-UCC-CAG-CUU-U | L-003406-00-0020<br>ON-TARGETplus SMARTpool | Dharmacon    |
| siLuciferase | CUUACGCUGAGUACUUCGA                                                                                              | Tilman et al. 2012                          | Eurogentec   |

**Table S7.** Primer sequences, PCR and qPCR reagents and conditions.

| Gene             | Forward primer (5'-3')                 | Reverse primer (5'-3')              | As-say   | Kit               | Manufac-turer      | Tempature/Time                                | Cycles |
|------------------|----------------------------------------|-------------------------------------|----------|-------------------|--------------------|-----------------------------------------------|--------|
| <i>NAP1L1</i>    | CCT-GGA-TCT-GAG-AGC-<br>TTC-TCT-T      | ACA-CCG-CTC-GCG-ATC-<br>CAA-T       | PCR      | DreamTaq          | Ther-moFischer     | Annealing: 60°C, 30s<br>Extension: 72°C, 30s  | 36     |
| <i>NAA11</i>     | GCA-GTG-ACA-GCA-<br>AAG-AAC-CTA        | GAT-CCC-AGC-AGG-<br>ATA-TGT-GAA     | PCR      | DreamTaq          | Ther-moFischer     | Annealing: 60°C, 30s<br>Extension: 72°C, 30s  | 36     |
| <i>EPS8L3</i>    | TGA-GCT-CGT-ACA-CAT-<br>CCT-CTT        | ACA-GGG-TCC-TGG-TAT-<br>CCT-A       | PCR      | DreamTaq          | Ther-moFischer     | Annealing: 60°C, 30s<br>Extension: 72°C, 30s  | 36     |
| <i>VIL1</i>      | CGT-GTT-CAA-TGC-TAA-<br>CAG-CAA-C      | ATG-AGA-CCC-TAC-<br>AAT-CAG-GGT-A   | PCR      | DreamTaq          | Ther-moFischer     | Annealing: 60°C, 30s<br>Extension: 72°C, 30s  | 36     |
| <i>GJB5</i>      | GCA-GGC-TCT-GTC-CTG-<br>GAA-ACA        | CGA-GTA-TTG-CAG-TCG-<br>AAG-TCC-T   | PCR      | DreamTaq          | Ther-moFischer     | Annealing: 60°C, 30s<br>Extension: 72°C, 30s  | 36     |
| <i>SER-PINB5</i> | TTC-CAG-GAT-AAC-TGT-<br>GAC-T          | TCC-AAA-GGG-TAC-<br>ATC-TTT-GAC-A   | PCR      | DreamTaq          | Ther-moFischer     | Annealing: 60°C, 30s<br>Extension: 72°C, 30s  | 36     |
| <i>MAGEA1</i>    | GCC-GAA-GGA-ACC-<br>TGA-CC             | ACT-GGG-TTG-CCT-CTG-<br>TCG         | PCR      | DreamTaq          | Ther-moFischer     | Annealing: 62°C, 30s<br>Extension: 72°C, 1min | 35     |
| <i>PGLYRP3</i>   | CGT-CTA-CAC-CAT-AGG-<br>CTG-GT         | CCT-TCT-GGA-TGG-CAT-<br>AGG-AGA-TCA | PCR      | DreamTaq          | Ther-moFischer     | Annealing: 60°C, 30s<br>Extension: 72°C, 30s  | 36     |
| <i>ACTB</i>      | CCC-TGG-ACT-TCG-AGC-<br>AAG-AGA-T      | AAG-GTA-GTT-TCG-TGG-<br>ATG-CCA-CA  | PCR      | DreamTaq          | Ther-moFischer     | Annealing: 60°C, 30s<br>Extension: 72°C, 30s  | 20     |
| <i>HNF4A</i>     | CAT-ACG-CAT-CCT-TGA-<br>CGA-GCT        | GAT-GAA-CTG-GAT-CTG-<br>CTC-GAT     | qPC<br>R | KAPA SYBR<br>FAST | Sigma Al-<br>drich | Annealing: 60°C, 30s<br>Extension: 60°C, 30s  | 40     |
| <i>MUC13</i>     | GCC-ATC-ATT-CAT-CTT-<br>ACT-CTT-CT     | TCA-CTG-TCT-GCA-GCA-<br>GTA-GGT     | qPC<br>R | KAPA SYBR<br>FAST | Sigma Al-<br>drich | Annealing: 60°C, 30s<br>Extension: 60°C, 30s  | 40     |
| <i>CT-GABRA3</i> | GAA-AGA-AAG-AAA-<br>GGT-CAC-AGG-TCT-CT | GCC-AAT-GTC-CTG-CTT-<br>CAC-AAA-GT  | qPC<br>R | KAPA SYBR<br>FAST | Sigma Al-<br>drich | Annealing: 60°C, 30s<br>Extension: 60°C, 30s  | 40     |
| <i>ACTB</i>      | CCC-TGG-ACT-TCG-AGC-<br>AAG-AGA-T      | AAG-GTA-GTT-TCG-TGG-<br>ATG-CCA-CA  | qPC<br>R | KAPA SYBR<br>FAST | Sigma Al-<br>drich | Annealing: 60°C, 30s<br>Extension: 60°C, 30s  | 40     |
| <i>EPS8L3</i>    | TGA-GCT-CGT-ACA-CAT-<br>CCT-CTT        | ACA-GGG-TCC-TGG-TAT-<br>CCT-A       | qPC<br>R | KAPA SYBR<br>FAST | Sigma Al-<br>drich | Annealing: 60°C, 30s<br>Extension: 60°C, 30s  | 40     |
| <i>VIL1</i>      | CGT-GTT-CAA-TGC-TAA-<br>CAG-CAA-C      | ATG-AGA-CCC-TAC-<br>AAT-CAG-GGT-A   | qPC<br>R | KAPA SYBR<br>FAST | Sigma Al-<br>drich | Annealing: 60°C, 30s<br>Extension: 60°C, 30s  | 40     |
